# Supplementary material
Source: ML conference proceedings conference paper supplement (https://openreview.net/forum?id=hE5RWzQyvf)
Supplement: supplementary_material [file attachment]

---

# Distributionally Robust Linear Quadratic Control: Supplementary Material

---

Anonymous Author(s)

Affiliation

Address

email

1 The supplementary material is structured as follows. Appendix §A presents the well-known solution  
2 to the classic LQG problem using dynamic programming and Kalman Filter estimation. Appendix §B  
3 provides the definitions of the stacked system matrices utilized in the compact formulation (5) of the  
4 distributionally robust LQG problem. Appendix §C contains the proofs of the formal statements in  
5 the main text and provides additional technical results. Appendix §D derives the SDP reformulation  
6 of the dual problem (11). Appendix §E, finally, elaborates on the bisection algorithm used for solving  
7 the linearization oracle of the Frank-Wolfe algorithm.

## 8 A. Solution of the LQG Problem

9 The classic LQG problem can be solved efficiently via dynamic programming; see, e.g., [3]. That  
10 is, the unique optimal control inputs satisfy  $u_t^* = K_t \hat{x}_t$  for every  $t \in [T - 1]$ , where  $K_t \in \mathbb{R}^{n \times n}$  is  
11 the optimal feedback gain matrix, and  $\hat{x}_t = \mathbb{E}_{\mathbb{P}}[x_t | y_0, \dots, y_t]$  is the minimum mean-squared-error  
12 estimator of  $x_t$  given the observation history up to time  $t$ . Thanks to the celebrated separation  
13 principle,  $K_t$  can be computed by pretending that the system is deterministic and allows for perfect  
14 state observations, and  $\hat{x}_t$  can be computed while ignoring the control problem.

15 To compute  $K_t$ , one first solves the deterministic LQR problem corresponding to the LQG problem  
16 at hand. Its value function  $x_t^\top P_t x_t$  at time  $t$  is quadratic in  $x_t$ , and  $P_t$  obeys the backward recursion

$$P_t = A_t^\top P_{t+1} A_t + Q_t - A_t^\top P_{t+1} B_t (R_t + B_t^\top P_{t+1} B_t)^{-1} B_t^\top P_{t+1} A_t \quad \forall t \in [T - 1] \quad (\text{A.1a})$$

17 initialized by  $P_T = Q_T$ . The optimal feedback gain matrix  $K_t$  can then be computed from  $P_{t+1}$  as

$$K_t = -(R_t + B_t^\top P_{t+1} B_t)^{-1} B_t^\top P_{t+1} A_t \quad \forall t \in [T - 1]. \quad (\text{A.1b})$$

18 Since  $x_t$  and  $(y_0, \dots, y_t)$  are jointly normally distributed, the minimum mean-squared-error estimator  
19  $\hat{x}_t$  can be calculated directly using the formula for the mean of a conditional normal distribution.  
20 Alternatively, however, one can use the Kalman filter to compute  $\hat{x}_t$  recursively, which is significantly  
21 more insightful and efficient. The Kalman filter also recursively computes the covariance matrix  $\Sigma_t$   
22 of  $x_t$  conditional on  $y_0, \dots, y_t$  and the covariance matrix  $\Sigma_{t+1|t}$  of  $x_{t+1}$  conditional on  $y_0, \dots, y_t$   
23 evaluated under  $\mathbb{P}$ . Specifically, these covariance matrices obey the forward recursion

$$\left. \begin{aligned} \Sigma_t &= \Sigma_{t|t-1} - \Sigma_{t|t-1} C_t^\top (C_t \Sigma_{t|t-1} C_t^\top + V_t)^{-1} C_t \Sigma_{t|t-1} \\ \Sigma_{t+1|t} &= A_t \Sigma_t A_t^\top + W_t \end{aligned} \right\} \forall t \in [T - 1] \quad (\text{A.2})$$

24 initialized by  $\Sigma_{0|-1} = X_0$ . Using  $\Sigma_{t|t-1}$ , we then define the Kalman filter gain as

$$L_t = \Sigma_t C_t^\top V_t^{-1} \quad \forall t \in [T - 1]$$

25 which allows us to compute the minimum mean-squared-error estimator via the forward recursion

$$\hat{x}_{t+1} = A_t \hat{x}_t + B_t u_t + L_{t+1} (y_{t+1} - C_{t+1} (A_t \hat{x}_t + B_t u_t)) \quad \forall t \in [T - 1]$$

26 initialized by  $\hat{x}_0 = L_0 y_0$ . One can also show that the optimal value of the LQG problem amounts to

$$\sum_{t=0}^{T-1} \text{Tr}((Q_t - P_t) \Sigma_t) + \sum_{t=1}^T \text{Tr}(P_t (A_{t-1} \Sigma_{t-1} A_{t-1}^\top + W_{t-1})) + \text{Tr}(P_0 X_0). \quad (\text{A.3})$$

## 27 B. Definitions of Stacked System Matrices

28 The stacked system matrices appearing in the distributionally robust LQG problem (5) are defined as  
 29 follows. First, the stacked state and input cost matrices  $Q \in \mathbb{S}^{n(T+1)}$  and  $R \in \mathbb{S}^{mT}$  are set to

$$Q = \begin{bmatrix} Q_0 & & & \\ & Q_1 & & \\ & & \ddots & \\ & & & Q_T \end{bmatrix} \quad \text{and} \quad R = \begin{bmatrix} R_0 & & & \\ & R_1 & & \\ & & \ddots & \\ & & & R_{T-1} \end{bmatrix},$$

30 respectively. Similarly, the stacked matrices appearing in the linear dynamics and the measurement  
 31 equations  $C \in \mathbb{R}^{pT \times n(T+1)}$ ,  $G \in \mathbb{R}^{n(T+1) \times n(T+1)}$  and  $H \in \mathbb{R}^{n(T+1) \times mT}$  are defined as

$$C = \begin{bmatrix} C_0 & 0 & & & \\ & C_1 & 0 & & \\ & & \ddots & \ddots & \\ & & & C_{T-1} & 0 \end{bmatrix}, \quad G = \begin{bmatrix} A_0^0 & & & \\ A_0^1 & A_1^1 & & \\ \vdots & & \ddots & \\ A_0^T & A_1^T & \dots & A_T^T \end{bmatrix}$$

32 and

$$H = \begin{bmatrix} 0 & & & & \\ A_1^1 B_0 & 0 & & & \\ A_1^2 B_0 & A_2^2 B_1 & 0 & & \\ \vdots & & & \ddots & \\ \vdots & & & & 0 \\ A_1^T B_0 & A_2^T B_1 & \dots & \dots & A_T^T B_{T-1} \end{bmatrix},$$

33 respectively, where  $A_s^t = \prod_{k=s}^{t-1} A_k$  for every  $s < t$  and  $A_s^s = I_n$  for  $s = t$ .

34 Using the stacked system matrices, we can now express the purified observation process  $\eta$  as a linear  
 35 function of the exogenous uncertainties  $w$  and  $v$  that is *not* impacted by  $u$ ; see also [2, 7]

36 **Lemma B.1.** *We have  $\eta = Dw + v$ , where  $D = CG$ .*

37 *Proof of Lemma B.1.* The purified observation process is defined as  $\eta = y - \hat{y}$ . Recall now that  
 38 the observations of the original system satisfy  $y = Cx + v$ . Similarly, one readily verifies that the  
 39 observations of the fictitious noise-free system satisfy  $\hat{y} = C\hat{x}$ . Thus, we have  $\eta = C(x - \hat{x}) + v$ .  
 40 Next, recall that the state of the original system satisfies  $x = Hu + Gw$ , and note that the state of the  
 41 fictitious noise-free system satisfies  $\hat{x} = Hu$ . Combining all of these linear equations finally shows  
 42 that  $u$  cancels out and that  $\eta = CGw + v = Dw + v$ .  $\square$

## 43 C. Proofs

### 44 C.1. Additional Technical Results

45 It is well known that every causal controller that is linear in the original observations  $y$  can be  
 46 reformulated as a causal controller that is linear in the purified observations  $\eta$  and vice versa [2, 7].  
 47 Perhaps surprisingly, however, the one-to-one transformation between the respective coefficients of  $y$   
 48 and  $\eta$  is *not* linear. To keep this paper self-contained, we review these insights in the next lemma.

49 **Lemma C.1.** *If  $u = U\eta + q$  for some  $U \in \mathcal{U}$  and  $q \in \mathbb{R}^{pT}$ , then  $u = U'y + q'$  for  $U' =$   
 50  $(I + UCH)^{-1}U$  and  $q' = (I + UCH)^{-1}q$ . Conversely, if  $u = U'y + q'$  for some  $U' \in \mathcal{U}$  and  
 51  $q' \in \mathbb{R}^{pT}$ , then  $u = U\eta + q$  for  $U = (I - U'CH)^{-1}$  and  $q = (I - U'CH)^{-1}q'$ .*

52 *Proof of Lemma C.1.* If  $u = U\eta + q$  for some  $U \in \mathcal{U}$  and  $q \in \mathbb{R}^{pT}$ , then we have

$$u = U\eta + q = U(y - \hat{y}) + q = Uy - UC\hat{x} + q = Uy - UCHu + q,$$

53 where the second equality follows from the definition of  $\eta$ , the third equality holds because  $y = Cx + v$ ,  
 54 and the last equality exploits our earlier insight that  $\hat{y} = C\hat{x}$ . The last expression depends only on  $y$   
 55 and  $u$ . Solving for  $u$  yields  $u = U'y + q'$ , where  $U' = (I + UCH)^{-1}U$  and  $q' = (I + UCH)^{-1}q$ .

56 Note that  $(I + UCH)$  is indeed invertible because  $I + UCH$  is a lower triangular matrix with all  
57 diagonal entries equal to one, ensuring a determinant of one.

58 Similarly, if  $u = U'y + q'$  for some  $U' \in \mathcal{U}$  and  $q' \in \mathbb{R}^{pT}$ , then we have

$$u = U'y + q' = U'(\eta + \hat{y}) + q' = U'\eta + U'CH\hat{x} + q' = U'\eta + U'CHu + q'.$$

59 Solving for  $u$  yields  $u = U\eta + q$ , where  $U = (I - U'CH)^{-1}U'$  and  $q = (I - U'CH)^{-1}q'$ . Note  
60 again that  $(I - U'CH)$  is indeed invertible because  $(I - U'CH)$  is a lower triangular matrix with  
61 all diagonal entries equal to one.  $\square$

## 62 C.2. Proofs of Section 3

63 *Proof of Proposition 3.2.* In problem (8), both  $u$  and  $x$  are linear in  $w$  and  $v$ , i.e.,  $u = q + UDw + Uv$   
64 and  $x = Hu + Gw = Hq + HUDw + HUv + Gw$ . By substituting the linear representations of  $u$   
65 and  $x$  into the objective function of problem (8), we obtain the following equivalent reformulation.

$$\begin{aligned} \min_{\substack{q \in \mathbb{R}^{pT} \\ U \in \mathcal{U}}} \max_{\mathbb{P} \in \mathcal{G}} \mathbb{E}_{\mathbb{P}} [w^{\top} (D^{\top}U^{\top}(R + H^{\top}QH)UD + 2D^{\top}U^{\top}H^{\top}QG + G^{\top}QG) w] \\ + \mathbb{E}_{\mathbb{P}} [v^{\top} (U^{\top}(R + H^{\top}QH)U) v] + q^{\top} (R + H^{\top}QH)q \end{aligned}$$

66 For any fixed  $\mathbb{P} \in \mathcal{G}$ , we can express the expectation in the objective function of the above problem  
67 in terms of the covariance matrices  $W = \mathbb{E}_{\mathbb{P}}[ww^{\top}]$  and  $V = \mathbb{E}_{\mathbb{P}}[vv^{\top}]$ . Thus, the problem becomes

$$\begin{aligned} \min_{\substack{q \in \mathbb{R}^{pT} \\ U \in \mathcal{U}}} \max_{W, V, \mathbb{P}} \text{Tr}((D^{\top}U^{\top}(R + H^{\top}QH)UD + 2G^{\top}QH UD + G^{\top}QG)W) \\ + \text{Tr}((U^{\top}(R + H^{\top}QH)U)V) + q^{\top}(R + H^{\top}QH)q \quad (\text{A.4}) \\ \text{s.t. } \mathbb{P} \in \mathcal{G}, \quad W = \mathbb{E}_{\mathbb{P}}[ww^{\top}], \quad V = \mathbb{E}_{\mathbb{P}}[vv^{\top}]. \end{aligned}$$

68 Recall now the definition of  $\mathcal{G}$ , and note that the requirements  $\mathbb{G}(X_0, \hat{X}_0) \leq \rho_{x_0}$ ,  $\mathbb{G}(W_t, \hat{W}_t) \leq \rho_{w_t}$   
69 and  $\mathbb{G}(V_t, \hat{V}_t) \leq \rho_{v_t}$  are equivalent to the convex constraints  $\mathbb{G}(X_0, \hat{X}_0)^2 \leq \rho_{x_0}^2$ ,  $\mathbb{G}(W_t, \hat{W}_t)^2 \leq \rho_{w_t}^2$   
70 and  $\mathbb{G}(V_t, \hat{V}_t)^2 \leq \rho_{v_t}^2$ , respectively, for all  $t \in [T - 1]$ . The definition of  $\mathcal{G}$  also implies that

$$W = \mathbb{E}_{\mathbb{P}}[ww^{\top}] = \text{diag}(X_0, W_0, \dots, W_{T-1}) \quad \text{and} \quad V = \mathbb{E}_{\mathbb{P}}[vv^{\top}] = \text{diag}(V_0, \dots, V_{T-1}).$$

71 Problem (A.4) thus constitutes a relaxation of problem (9). Indeed, the feasible set of the inner  
72 maximization problem in (A.4) is a subset of the feasible set of the inner maximization problem  
73 in (9). Moreover, for any  $W$  and  $V$  feasible in the inner maximization problem in (9), the distribution  
74  $\mathbb{P} = \mathbb{P}_{x_0} \times (\times_{t=0}^{T-1} \mathbb{P}_{w_t}) \times (\times_{t=0}^{T-1} \mathbb{P}_{v_t})$  defined through  $\mathbb{P}_{x_0} = \mathcal{N}(0, X_0)$ ,  $\mathbb{P}_{w_t} = \mathcal{N}(0, W_t)$  and  
75  $\mathbb{P}_{v_t} = \mathcal{N}(0, V_t)$ ,  $t \in [T - 1]$ , is feasible in the inner maximization problem in (A.4) with the same  
76 objective value. The relaxation is thus exact, and the optimal values of (8), (9) and (A.4) coincide.  $\square$

77 *Proof of Proposition 3.4.* Recall that the space  $\mathcal{U}_y$  of all causal output-feedback controllers coincides  
78 with the space  $\mathcal{U}_{\eta}$  of all causal *purified* output-feedback controllers. We can thus replace the feasible  
79 set  $\mathcal{U}_{\eta}$  of the inner minimization problem in (10) with  $\mathcal{U}_y$ . Hence, for any fixed  $\mathbb{P} \in \mathcal{W}_{\mathcal{N}}$ , the inner  
80 minimization problem in (10) constitutes a classic LQG problem. By standard LQG theory [3], it is  
81 solved by a *linear* output-feedback controller of the form  $u = U'y + q'$  for some  $U' \in \mathcal{U}$  and  $q' \in \mathbb{R}^{pT}$ ;  
82 see also Appendix §A. Lemma C.1 shows, however, that any linear output-feedback controller can  
83 be equivalently expressed as a linear *purified*-output feedback controller of the form  $u = U\eta + q$   
84 for some  $U \in \mathcal{U}$  and  $q \in \mathbb{R}^{pT}$ . In summary, the above reasoning shows that the feasible set of the  
85 inner minimization problem in (10) can be reduced to the family of all linear purified-output feedback  
86 controllers without sacrificing optimality. Thus, problem (10) is equivalent to

$$\begin{aligned} \max_{\mathbb{P} \in \mathcal{W}_{\mathcal{N}}} \min_{q, U, x, u} \mathbb{E}_{\mathbb{P}} [u^{\top} Ru + x^{\top} Qx] \\ \text{s.t. } U \in \mathcal{U}, \quad u = q + U\eta, \quad x = Hu + Gw. \end{aligned}$$

87 Using a similar reasoning as in the proof of Proposition 3.2, we can now substitute the linear  
88 representations of  $u$  and  $x$  into the objective function and reformulate the above problem as

$$\begin{aligned} \max_{W, V, \mathbb{P}} \min_{\substack{q \in \mathbb{R}^{pT} \\ U \in \mathcal{U}}} \text{Tr}((D^{\top}U^{\top}(R + H^{\top}QH)UD + 2G^{\top}QH UD + G^{\top}QG)W) \\ + \text{Tr}((U^{\top}(R + H^{\top}QH)U)V) + q^{\top}(R + H^{\top}QH)q \\ \text{s.t. } \mathbb{P} \in \mathcal{W}_{\mathcal{N}}, \quad W = \mathbb{E}_{\mathbb{P}}[ww^{\top}], \quad V = \mathbb{E}_{\mathbb{P}}[vv^{\top}]. \end{aligned}$$

89 As  $\mathcal{W}_{\mathcal{N}}$  contains only *normal* distributions, Proposition 3.3 implies that  $\mathbb{W}(\mathbb{P}_{x_0}, \hat{\mathbb{P}}_{x_0}) = \mathbb{G}(X_0, \hat{X}_0)$ ,  
90  $\mathbb{W}(\mathbb{P}_{w_t}, \hat{\mathbb{P}}_{w_t}) = \mathbb{G}(W_t, \hat{W}_t)$  and  $\mathbb{W}(\mathbb{P}_{v_t}, \hat{\mathbb{P}}_{v_t}) = \mathbb{G}(V_t, \hat{V}_t)$  for all  $t \in [T-1]$ . We may thus  
91 replace the requirement  $\mathbb{W}(\mathbb{P}_{x_0}, \hat{\mathbb{P}}_{x_0}) \leq \rho_{x_0}$  in the definition of  $\mathcal{W}_{\mathcal{N}}$  by  $\mathbb{G}(X_0, \hat{X}_0) \leq \rho_{x_0}$ , which is  
92 equivalent to the convex constraint  $\mathbb{G}(X_0, \hat{X}_0)^2 \leq \rho_{x_0}^2$ . The conditions on the marginal distributions  
93 of  $w_t$  and  $v_t$ ,  $t \in [T-1]$ , admit similar reformulations. The definition of  $\mathcal{W}_{\mathcal{N}}$  also implies that

$$W = \mathbb{E}_{\mathbb{P}}[ww^{\top}] = \text{diag}(X_0, W_0, \dots, W_{T-1}) \quad \text{and} \quad V = \mathbb{E}_{\mathbb{P}}[vv^{\top}] = \text{diag}(V_0, \dots, V_{T-1}).$$

94 Thus, the feasible set of the outer maximization problem in (11) constitutes a relaxation of that  
95 in (10). One readily verifies that the relaxation is exact by using similar arguments as in the proof of  
96 Proposition 3.2. Thus, the claim follows.  $\square$

97 *Proof of Theorem 3.5.* By Proposition 3.2,  $\bar{p}^*$  coincides with the minimum of (9). Similarly, by  
98 Proposition 3.4  $\underline{d}^*$  coincides with the maximum of (11). Note that problems (9) and (11) only differ  
99 by the order of minimization and maximization. Note also that  $\mathcal{U}$  is convex and closed,  $\mathcal{G}_W$  and  $\mathcal{G}_V$   
100 are convex and compact by virtue of [5, Lemma A.6], and the (identical) trace terms in (9) and (11)  
101 are bilinear in  $(W, V)$  and  $(U, q)$ . The claim thus follows from Sion's minimax theorem [6].  $\square$

### 102 C.3. Proofs of Section 4

103 Note that Proposition 4.1 is consistent with Corollary 3 because the optimal LQG controller corre-  
104 sponding to  $\mathbb{P}^*$  is linear in the past observations.

105 *Proof of Proposition 4.1.* By [5, Lemma A.3], the inner problem in (9) admits a maximizer  $(W^*, V^*)$   
106 with  $X_0^* \succeq \lambda_{\min}(\hat{X}_0)$  as well as  $W_t^* \succeq \lambda_{\min}(\hat{W}_t)$  and  $V_t^* \succeq \lambda_{\min}(\hat{V}_t)$  for all  $t \in [T-1]$ . Thus,  
107 the optimal value of problem (9) and its strong dual (11) does not change if we restrict  $\mathcal{G}_W$  and  $\mathcal{G}_V$   
108 to  $\mathcal{G}_W^+$  and  $\mathcal{G}_V^+$ , respectively. We may thus conclude that problem (11) has a maximizer  $(W^*, V^*)$   
109 with  $V_t^* \succeq \lambda_{\min}(\hat{V}_t) \succ 0$  for all  $t \in [T-1]$ . This in turn implies that problem (6) is solved by a  
110 normal distribution  $\mathbb{P}^*$  under which the covariance matrix of the observation noise  $v_t$  satisfies  $V_t^* \succ 0$   
111 for every  $t \in [T-1]$ . As (5) and (6) are strong duals, the optimal solution  $u^*$  of problem (5)  
112 forms a Nash equilibrium with  $\mathbb{P}^*$ , i.e.,  $u^*$  is a best response to  $\mathbb{P}^*$  and thus solves the *classic* LQG  
113 problem corresponding to  $\mathbb{P}^*$ . As  $R_t \succ 0$  for every  $t \in [T-1]$ , this best response  $u^*$  is unique, and  
114 as  $V_t^* \succ 0$  for every  $t \in [T-1]$ ,  $u^*$  is in fact the Kalman filter-based optimal output-feedback strategy  
115 corresponding to  $\mathbb{P}^*$  (which can be obtained using the techniques highlighted in Appendix §A).  $\square$

116 Before proving Proposition 4.2, recall that  $f(W, V)$  is called  $\beta$ -smooth for some  $\beta > 0$  if

$$|\nabla f(W, V) - \nabla f(W', V')| \leq \beta (\|W - W'\|_F^2 + \|V - V'\|_F^2)^{\frac{1}{2}} \quad \forall W, W' \in \mathcal{G}_W^+, V, V' \in \mathcal{G}_V^+,$$

117 where  $\|\cdot\|_F$  denotes the Frobenius norm.

118 *Proof of Proposition 4.2.* The function  $f(W, V)$  is concave because the objective function of the  
119 inner minimization problem in (11) is linear (and hence concave) in  $W$  and  $V$  and because concavity is  
120 preserved under minimization. To prove that  $f(W, V)$  is  $\beta$ -smooth, we first recall from Proposition 3.3  
121 that it coincides with the optimal value of the inner minimization problem in (10). As  $\mathcal{U}_\eta = \mathcal{U}_y$ ,  
122  $f(W, V)$  can thus be viewed as the optimal value of the classic LQG problem corresponding to the  
123 normal distribution  $\mathbb{P}$  determined by the covariance matrices  $W$  and  $V$ . Hence,  $f(W, V)$  coincides  
124 with (A.3), where  $\Sigma_t$ , for  $t \in [T-1]$ , is a function of  $(W, V)$  defined recursively through the Kalman  
125 filter equations (A.2). Note that all inverse matrices in (A.2) are well-defined because any  $V \in \mathcal{G}_V^+$  is  
126 strictly positive definite. Therefore,  $\Sigma_t$  constitutes a proper rational function (that is, a ratio of two  
127 polynomials with the polynomial in the denominator being strictly positive) for every  $t \in [T-1]$ .  
128 Thus,  $f(W, V)$  is infinitely often continuously differentiable on a neighborhood of  $\mathcal{G}_W^+ \times \mathcal{G}_V^+$ .

129 As  $f(W, V)$  is concave and (at least) twice continuously differentiable, it is  $\beta$ -smooth on  $\mathcal{G}_W^+ \times \mathcal{G}_V^+$   
130 if and only if the largest eigenvalue of the Hessian matrix of  $-f(W, V)$  is bounded above by  $\beta$   
131 throughout  $\mathcal{G}_W^+ \times \mathcal{G}_V^+$ . Also, the largest eigenvalue of the positive semidefinite Hessian matrix  
132  $\nabla^2(-f(W, V))$  coincides with the spectral norm of  $\nabla^2 f(W, V)$ . We may thus set

$$\beta = \sup_{W \in \mathcal{G}_W^+, V \in \mathcal{G}_V^+} \|\nabla^2 f(W, V)\|_2, \quad (\text{A.5})$$

133 where  $\|\cdot\|_2$  denotes the spectral norm. The supremum in the above maximization problem is finite  
 134 and attained thanks to Weierstrass' theorem, which applies because  $f(W, V)$  is twice continuously  
 135 differentiable and the spectral norm is continuous, while the sets  $\mathcal{G}_W^+$  and  $\mathcal{G}_V^+$  are compact by virtue  
 136 of [5, Lemma A.6]. This observation completes the proof.  $\square$

## 137 D. SDP Reformulation of the Dual Problem (11)

138 Instead of solving the dual problem (11) with the customized Frank-Wolfe algorithm of Section 4, it  
 139 can be reformulated as an SDP amenable to off-the-shelf solvers. This reformulation is obtained by  
 140 dualizing the inner minimization problem and by exploiting the following preliminary lemma.

141 **Lemma D.1.** *For any  $\hat{Z} \in \mathbb{S}_+^d$  and  $\rho_z \geq 0$ , the set  $\mathcal{G}_Z = \{Z \in \mathbb{S}_+^d : \mathbb{G}(Z, \hat{Z}) \leq \rho_z\}$  coincides with*

$$\left\{ Z \in \mathbb{S}_+^d : \exists E_z \in \mathbb{S}_+^d \text{ with } \text{Tr}(Z + \hat{Z} - 2E_z) \leq \rho_z^2, \begin{bmatrix} \hat{Z}^{\frac{1}{2}} Z \hat{Z}^{\frac{1}{2}} & E_z \\ E_z & I \end{bmatrix} \succeq 0 \right\}.$$

142 *Proof of Lemma D.1.* By Definition 2, we have

$$\mathcal{G}_Z = \{Z \in \mathbb{S}_+^d : \text{Tr}(Z + \hat{Z} - 2(\hat{Z}^{\frac{1}{2}} Z \hat{Z}^{\frac{1}{2}})^{\frac{1}{2}}) \leq \rho_z^2\}.$$

143 Next, introduce an auxiliary variable  $E_z \in \mathbb{S}_+^d$  subject to the matrix inequality  $E_z^2 \preceq (\hat{Z}^{\frac{1}{2}} Z \hat{Z}^{\frac{1}{2}})$ .  
 144 By [1, Theorem 1], this inequality can be recast as  $E_z \preceq (\hat{Z}^{\frac{1}{2}} Z \hat{Z}^{\frac{1}{2}})^{\frac{1}{2}}$ . Hence, we can reformulate the  
 145 nonlinear matrix inequality in the above representation of  $\mathcal{G}_Z$  as  $\text{Tr}(Z + \hat{Z} - 2E_z) \leq \rho_z^2$ . A standard  
 146 Schur complement argument reveals that the inequality  $E_z^2 \preceq (\hat{Z}^{\frac{1}{2}} Z \hat{Z}^{\frac{1}{2}})$  is also equivalent to

$$\begin{bmatrix} \hat{Z}^{\frac{1}{2}} Z \hat{Z}^{\frac{1}{2}} & E_z \\ E_z & I \end{bmatrix} \succeq 0.$$

147 The claim then follows by combining all of these insights.  $\square$

148 We are now ready to derive the desired SDP reformulation of problem (11).

149 **Proposition D.2.** *If  $\hat{V} \succ 0$ , then problem (11) is equivalent to the SDP*

$$\begin{aligned} \max \quad & \text{Tr}(G^\top QGW) - \text{Tr}(F(R + H^\top QH)^{-1}) \\ \text{s.t.} \quad & W \in \mathbb{S}_+^{n(T+1)}, V \in \mathbb{S}_+^{pT}, M \in \mathcal{M}, F \in \mathbb{S}_+^{Tm} \\ & E_{x_0} \in \mathbb{S}_+^n, E_{w_t} \in \mathbb{S}_+^n, E_{v_t} \in \mathbb{S}_+^p \quad \forall t \in [T-1] \\ & \text{Tr}(W_0 + \hat{X}_0 - 2E_{x_0}) \leq \rho_{x_0}^2, \\ & \text{Tr}(W_{t+1} + \hat{W}_t - 2E_{w_t}) \leq \rho_{w_t}^2, \quad \text{Tr}(V_t + \hat{V}_t - 2E_{v_t}) \leq \rho_{v_t}^2 \quad \forall t \in [T-1] \\ & \begin{bmatrix} \hat{X}_0^{\frac{1}{2}} X_0 \hat{X}_0^{\frac{1}{2}} & E_{x_0} \\ E_{x_0} & I_n \end{bmatrix} \succeq 0, \\ & \begin{bmatrix} \hat{W}_t^{\frac{1}{2}} W_{t+1} \hat{W}_t^{\frac{1}{2}} & E_{w_t} \\ E_{w_t} & I_n \end{bmatrix} \succeq 0, \quad \begin{bmatrix} \hat{V}_t^{\frac{1}{2}} V_t \hat{V}_t^{\frac{1}{2}} & E_{v_t} \\ E_{v_t} & I_p \end{bmatrix} \succeq 0 \quad \forall t \in [T-1] \\ & \begin{bmatrix} F & H^\top QGW D^\top + M/2 \\ (H^\top QGW D^\top + M/2)^\top & DWD^\top + V \end{bmatrix} \succeq 0 \\ & W_0 \succeq \lambda_{\min}(\hat{X}_0)I, \quad W_{t+1} \succeq \lambda_{\min}(\hat{W}_t)I, \quad V_t \succeq \lambda_{\min}(\hat{V}_t)I \quad \forall t \in [T-1]. \end{aligned} \tag{A.6}$$

150 Here,  $\mathcal{M}$  denotes the set of all strictly upper block triangular matrices of the form

$$\begin{bmatrix} 0 & M_{1,2} & M_{1,3} & \dots & M_{1,T} \\ & 0 & M_{2,3} & & M_{2,T} \\ & & \ddots & & \vdots \\ & & & 0 & M_{T-1,T} \\ & & & & 0 \end{bmatrix} \in \mathbb{R}^{Tm \times Tp},$$

151 where  $M_{t,s} \in \mathbb{R}^{m \times p}$  for every  $t, s \in \mathbb{Z}$  with  $1 \leq t < s \leq T$ .

152 *Proof of Proposition D.2.* The proof relies on dualizing the inner minimization problem in (11).  
 153 Note that strong duality holds because the primal problem is trivially feasible and involves only  
 154 equality constraints, which implies that any feasible point is in fact a Slater point. In the following we  
 155 use  $M \in \mathcal{M}$  to denote the Lagrange multiplier of the constraint  $U \in \mathcal{U}$ , which requires all blocks of  
 156 the matrix  $U$  above the main diagonal to vanish. The Lagrangian function of the inner minimization  
 157 problem in (11) can therefore be represented as

$$\mathcal{L}(q, U, M) = \text{Tr}((D^\top U^\top (R + H^\top QH)UD + G^\top QG)W) + 2 \text{Tr}(G^\top QHUDW) \\ + \text{Tr}((U^\top (R + H^\top QH)U)V) + q^\top (R + H^\top QH)q + \text{Tr}(UM^\top).$$

158 Recall now that  $R \succ 0$  and  $Q \succeq 0$ , and thus  $R + H^\top QH \succ 0$ . Consequently,  $\mathcal{L}$  is minimized by  
 159  $q^* = 0$  for any fixed  $U$  and  $M$ . In addition, the partial gradient of  $\mathcal{L}$  with respect  $U$  is given by

$$\frac{\partial \mathcal{L}}{\partial U} = 2(R + H^\top QH)UDWD^\top + 2(R + H^\top QH)UV + 2H^\top QGWD^\top + M.$$

160 Recall also that  $V \in \mathcal{G}_V^+$  is strictly positive, which implies that  $DWD^\top + V \succ 0$  is invertible. As  
 161 we already know that  $R + H^\top QH \succ 0$  is invertible, as well,  $\mathcal{L}$  is minimized by

$$U^* = -(R + H^\top QH)^{-1} (H^\top QGWD^\top + M/2) (DWD^\top + V)^{-1}$$

162 for any fixed  $M$ . Substituting both  $q^*$  and  $U^*$  into  $\mathcal{L}$  yields the dual objective function

$$g(M) = \mathcal{L}(q^*, U^*, M) = \text{Tr}(G^\top QGW) \\ - \text{Tr}((R + H^\top QH)^{-1} (H^\top QGWD^\top + M/2) (DWD^\top + V)^{-1} (H^\top QGWD^\top + M/2)^\top).$$

163 The dual of the inner minimization problem in (11) is thus given by  $\max_{M \in \mathcal{M}} g(M)$ . To linearize  
 164 the dual objective function, we next introduce an auxiliary variable  $F \in \mathbb{S}_+^{mT}$  subject to the matrix  
 165 inequality  $F \succeq (H^\top QGWD^\top + M/2) (DWD^\top + V)^{-1} (H^\top QGWD^\top + M/2)^\top$ . By using a  
 166 standard Schur complement reformulation, we can then rewrite the dual problem as

$$\max \quad \text{Tr}(G^\top QGW) - \text{Tr}((R + H^\top QH)^{-1} F) \\ \text{s.t.} \quad M \in \mathcal{M}, F \in \mathbb{S}_+^{mT} \\ \begin{bmatrix} F & H^\top QGWD^\top + M/2 \\ (H^\top QGWD^\top + M/2)^\top & DWD^\top + V \end{bmatrix} \succeq 0. \quad (\text{A.7})$$

167 Next, by replacing the inner problem in (11) with its strong dual (A.7), we can reformulate (11) as

$$\max \quad \text{Tr}(G^\top QGW) - \text{Tr}((R + H^\top QH)^{-1} F) \\ \text{s.t.} \quad M \in \mathcal{M}, F \in \mathbb{S}_+^{mT}, W \in \mathbb{S}_+^{n(T+1)}, V \in \mathbb{S}_+^{pT} \\ \begin{bmatrix} F & H^\top QGWD^\top + M/2 \\ (H^\top QGWD^\top + M/2)^\top & DWD^\top + V \end{bmatrix} \succeq 0 \\ \mathbb{G}(X_0, \hat{X}_0)^2 \leq \rho_{x_0}^2, \mathbb{G}(W_t, \hat{W}_t) \leq \rho_{w_t}^2, \mathbb{G}(V_t, \hat{V}_t) \leq \rho_{v_t}^2 \quad \forall t \in [T-1]. \quad (\text{A.8})$$

168 By Proposition 4.1, the inclusion of the constraints  $X_0 \succeq \lambda_{\min}(\hat{X}_0)I$ ,  $W_t \succeq \lambda_{\min}(\hat{W}_t)I$  and  
 169  $V_t \succeq \lambda_{\min}(\hat{V}_t)I$  for all  $t \in [T-1]$  has no effect on the solution to problem (A.8). In addition, by  
 170 Lemma D.1, each (non-linear) Gelbrich constraint in (A.8) can be reformulated as an equivalent  
 171 (linear) SDP constraint. Thus, problem (A.8) reduces to (A.6), and the claim follows.  $\square$

## 172 E. Bisection Algorithm for the Linearization Oracle

173 We now show that the direction-finding subproblem (14) can be solved efficiently via bisection. To  
 174 this end, we first establish that (14) can be reduced to the solution of a univariate algebraic equation.

175 **Proposition E.1** ([5, Proposition A.4 (iii)]). *If  $\hat{Z} \in \mathbb{S}_{++}^d$ ,  $\Gamma_Z \in \mathbb{S}_+^d$ ,  $\Gamma_Z \neq 0$  and  $\rho_z \in \mathbb{R}_{++}$ , then*

$$\max \quad \langle \Gamma_Z, L - Z \rangle \\ \text{s.t.} \quad \mathbb{G}(L, \hat{Z}) \leq \rho_z \\ L \succeq \lambda_{\min}(\hat{Z})I \quad (\text{A.9})$$

176 *is uniquely solved by  $L^* = (\gamma^*)^2(\gamma^*I - \Gamma_Z)^{-1} \hat{Z}(\gamma^*I - \Gamma_Z)^{-1}$ , where  $\gamma^*$  is the unique solution of*

$$\rho_z^2 - \langle \hat{Z}, (I - \gamma^*(\gamma^*I - \Gamma_Z)^{-1})^2 \rangle = 0 \quad (\text{A.10})$$

177 *in the interval  $(\lambda_{\max}(\Gamma_Z), \infty)$ .*

178 In practice, we need to solve the algebraic equation (A.10) numerically. The numerical error in  
 179 approximating  $\gamma^*$  should be contained to ensure that  $L^*$  approximates the exact maximizer of  
 180 problem (A.9). The next proposition shows that, for any tolerance  $\delta \in (0, 1)$ , a  $\delta$ -approximate  
 181 solution of (A.9) can be computed with an efficient bisection algorithm.

182 **Proposition E.2** ([5, Theorem 6.4]). *For any fixed  $\rho_z \in \mathbb{R}_{++}$ ,  $\hat{Z} \in \mathbb{S}_{++}^d$  and  $\Gamma_Z \in \mathbb{S}_+^d, \Gamma_Z \neq 0$ ,  
 183 define  $\mathcal{G}_Z^+ = \{Z \in \mathbb{S}_+^d : \mathbb{G}(Z, \hat{Z}) \leq \rho_z, Z \succeq \lambda_{\min}(\hat{Z})\}$  as the feasible set of problem (A.9), and  
 184 let  $Z \in \mathcal{G}_Z^+$  be any reference covariance matrix. Additionally, let  $\delta \in (0, 1)$  be the desired oracle  
 185 precision, and define  $\varphi(\gamma) = \gamma(\rho^2 + \langle \gamma I - \Gamma_Z \rangle^{-1} - I, \hat{Z}) - \langle Z, \Gamma_Z \rangle$  for any  $\gamma > \lambda_{\max}(\Gamma_Z)$ . Then,  
 186 Algorithm A.1 returns in finite time a matrix  $L_Z^\delta \in \mathbb{S}_+^d$  with the following properties. (i) Feasibility:  
 187  $L_Z^\delta \in \mathcal{G}_Z^+$  (ii)  $\delta$ -Suboptimality:  $\langle L_Z^\delta - Z, \Gamma_Z \rangle \geq \delta \max_{L \in \mathcal{G}_Z^+} \langle \Gamma_Z, L - Z \rangle$ .*

---

**Algorithm A.1** Bisection algorithm to compute  $L_Z^\delta$

---

**Input:** nominal covariance matrix  $\hat{Z} \in \mathbb{S}_{++}^d$ , radius  $\rho \in \mathbb{R}_{++}$ ,  
 reference covariance matrix  $Z \in \mathcal{G}_Z^+$ ,  
 gradient matrix  $\Gamma_Z \in \mathbb{S}_+^d, \Gamma_Z \neq 0$ , precision  $\delta \in (0, 1)$ ,  
 dual objective function  $\phi(\gamma)$  defined in Proposition E.2

- 1: set  $\lambda_1 \leftarrow \lambda_{\max}(\Gamma_Z)$ , and let  $p_1$  be an eigenvector for  $\lambda_1$
- 2: set  $\underline{\gamma} \leftarrow \lambda_1(1 + (p_1^\top \hat{Z} p_1)^{\frac{1}{2}}/\rho)$  and  $\bar{\gamma} \leftarrow \lambda_1(1 + \text{Tr}(\hat{Z})^{\frac{1}{2}}/\rho)$
- 3: **repeat**
- 4:   set  $\tilde{\gamma} \leftarrow (\bar{\gamma} + \underline{\gamma})/2$  and  $L \leftarrow (\tilde{\gamma})^2(\tilde{\gamma}I - \Gamma_Z)^{-1}\hat{Z}(\tilde{\gamma}I - \Gamma_Z)^{-1}$
- 5:   **if**  $\frac{d\phi}{d\tilde{\gamma}}(\tilde{\gamma}) < 0$  **then** set  $\underline{\gamma} \leftarrow \tilde{\gamma}$  **else**  $\bar{\gamma} \leftarrow \tilde{\gamma}$  **endif**
- 6: **until**  $\frac{d\phi}{d\tilde{\gamma}}(\tilde{\gamma}) > 0$  and  $\langle L - Z, \Gamma_Z \rangle \geq \delta\phi(\tilde{\gamma})$

**Output:**  $L$

---

188 In summary, for any  $Z \in \{X_0, W_0, \dots, W_{T-1}, V_0, \dots, V_{T-1}\}$ , Algorithm A.1 computes a  $\delta$ -  
 189 approximate solutions to the direction-finding subproblem (14) with  $\Gamma_Z = \nabla_Z f(W, V)$ .

## 190 F. Additional Information on Experiments

191 **Generation of Nominal Covariance Matrices.** The nominal covariance matrices of the exoge-  
 192 nous uncertainties are constructed randomly using the following procedure. For each exogenous  
 193 uncertainty  $z \in \{x_0, w_0, \dots, w_{T-1}, v_0, \dots, v_{T-1}\}$ , we denote the dimension of  $z$  by  $d$  and sample  
 194 a matrix  $M_Z \in \mathbb{R}^{d \times d}$  from the uniform distribution on the hypercube  $[0, 1]^{d \times d}$ . Next, we define  
 195  $\Xi_Z \in \mathbb{R}^{d \times d}$  as the orthogonal matrix whose columns represent the orthonormal eigenvectors of  
 196 the symmetric matrix  $M_Z + M_Z^\top$ . Finally, we set  $\hat{Z} = \Xi_Z \Lambda_Z \Xi_Z^\top$ , where  $\Lambda_Z$  is a diagonal matrix  
 197 whose main diagonal is sampled uniformly from the interval  $[1, 2]^d$ . The rationale for adopting this  
 198 cumbersome procedure is to ensure that the covariance matrix  $\hat{Z}$  is positive definite.

199 **Optimality Gap.** The optimality gap of the Frank-Wolfe algorithm visualized in Figure 1b is  
 200 calculated as the sum of the surrogate optimality gaps  $\langle L_Z^\delta - Z, \nabla_Z f(W, V) \rangle$  across all  $Z \in$   
 201  $\{X_0, W_0, \dots, W_{T-1}, V_0, \dots, V_{T-1}\}$ . For more information on the surrogate optimality gaps see [4].

## 202 References

- 203 [1] Richard Bellman. Some inequalities for the square root of a positive definite matrix. *Linear*  
 204 *Algebra and its Applications*, 1(3):321–324, 1968.
- 205 [2] Aharon Ben-Tal, Stephen Boyd, and Arkadi Nemirovski. Control of uncertainty-affected discrete  
 206 time linear systems via convex programming. *Available at Optimization Online*, 2005.
- 207 [3] Dimitri Bertsekas. *Dynamic Programming and Optimal Control*, volume I. Athena Scientific,  
 208 2017.

- 209 [4] Martin Jaggi. Revisiting Frank-Wolfe: Projection-free sparse convex optimization. In *International Conference on Machine Learning*, pages 427–435, 2013.  
210
- 211 [5] Viet Anh Nguyen, Soroosh Shafieezadeh-Abadeh, Daniel Kuhn, and Peyman Mohajerin Esfahani.  
212 Bridging Bayesian and minimax mean square error estimation via Wasserstein distributionally  
213 robust optimization. *Mathematics of Operations Research*, 48(1):1–37, 2023.
- 214 [6] Maurice Sion. On general minimax theorems. *Pacific Journal of Mathematics*, 8(1):171–176,  
215 1958.
- 216 [7] Joelle Skaf and Stephen P Boyd. Design of affine controllers via convex optimization. *IEEE*  
217 *Transactions on Automatic Control*, 55(11):2476–2487, 2010.
